# Supplementary material for: Development and characterization of a chronic implant mouse model for vagus nerve stimulation
Source: eLife. 2021 Apr 6;10:e61270. doi: 10.7554/eLife.61270 (PMC8051950; doi:10.7554/eLife.61270)
Supplement: Figure 2—source data 1. [file elife-61270-fig2-data1.xlsx]

## Sheet: Sheet1
	Max Intensity (1 or 2mA) for 5 seconds
Animal	HE before stim	HR after Stim	Delta	%
rcjh1 (DD_3)	355	319	36	10.1408
rcjh2 (DD_4)	470	445	25	5.31915
rcjh3 (DD_2)	500	420	80	16
rcjh4 (DD_1)	340	270	70	20.5882
	0.1mA for 5 seconds
	before	after	Delta	%
rcjh1 (DD_3)	360	360	0	0
rcjh2 (DD_4)	395	392	3	0.759494
rcjh3 (DD_2)	440	433	7	1.59091
rcjh4 (DD_1)	330	330	0	0
	0.2mA for 5 seconds
	before	after	Delta	%
rcjh1 (DD_3)	360	360	0	0
rcjh2 (DD_4)	405	398	7	1.7284
rcjh3 (DD_2)	410	403	7	1.70732
rcjh4 (DD_1)	350	345	5	1.42857
	0.4mA for 5 seconds
	before	after	Delta	%
rcjh1 (DD_3)	360	352	8	2.22222
rcjh2 (DD_4)	384	370	14	3.64583
rcjh3 (DD_2)	410	385	25	6.09756
rcjh4 (DD_1)	348	332	16	4.5977
	0.6mA for 5 seconds
	before	after	Delta	%
rcjh1 (DD_3)	360	320	40	11.1111
rcjh2 (DD_4)	404	390	14	3.46535
rcjh3 (DD_2)	415	384	31	7.46988
rcjh4 (DD_1)	342	320	22	6.43275
	0.8mA for 5 seconds
	before	after	Delta	%
rcjh1 (DD_3)	355	317	38	10.7042
rcjh2 (DD_4)	380	369	11	2.89474
rcjh3 (DD_2)	450	390	60	13.3333
rcjh4 (DD_1)	345	300	45	13.0435
	1mA for 5 seconds
	before	after	Delta	%
rcjh1 (DD_3)	355	319	36	10.1408
rcjh2 (DD_4)	370	353	17	4.59459
rcjh3 (DD_2)	445	380	65	14.6067
rcjh4 (DD_1)	330	282	48	14.5455
