# Supplementary material for: Development and characterization of a chronic implant mouse model for vagus nerve stimulation
Source: eLife. 2021 Apr 6;10:e61270. doi: 10.7554/eLife.61270 (PMC8051950; doi:10.7554/eLife.61270)
Supplement: Figure 3—source data 1. [file elife-61270-fig3-data1.xlsx]

## Sheet: Cohort 1 HRT @ 100us
	Animal
Day	1_1	1_2	1_3	1_4	1_5	1_6	1_7	1_8	1_9	1_10
1	80	100	300	200	100	200	200	400	400	200
2	400	80	150		600	200	300	500		200
3		80	200		600	150		600		200
4		150
5		600
6
7								1600
8	400
9	500
10								1600

## Sheet: Cohort 1 HRT @ 600us
	Animal
Day	1_1	1_2	1_3	1_4	1_5	1_6	1_7
1
2
3
4					400		400
5
6		400					400
7						400
8			400
9			400				400
10		400				400
11		400
12				400
13			400				400
14		400				400
15	400
16	400						600
17						400
18
19	400	400
20
21
22
23
24	400
25
26		400
27						400
28
29
30
31	400
32
33
34
35
36
37
38
39		400				400
40
41
42
43
44	400
45
46
47						400
48
49
50
51		400
52
53
54
55
56	400
57
58
59		400
60	400

## Sheet: Cohort 1 Impedance
	Animal
Day	1_1	1_2	1_3	1_4	1_5	1_6	1_7	1_8	1_9	1_10
1	5	15	12	9	9	13	32	8	10	19
2	5	15	15	9	9	32	24	8	12	7
3		15	15		9	12		9		10
4		16			9		30
5		20	12							40
6		19					55		7	50
7					9	100		7		50
8	7		16		8
9	7		13				50		8
10		19				500		9
11		19
12			13	9
13			10				44
14		19			9	220
15	7
16	7						8			24
17						1200
18			9	9
19	8	22
20								14
21
22
23
24	8
25
26		14					14
27						3700
28										12
29
30
31	5
32								14
33
34
35
36
37
38
39		14				16
40								13
41
42
43
44	8
45
46
47						14
48
49
50
51		16
52
53
54
55
56	9
57
58
59		16
60

## Sheet: Cohort 2 HRT @ 100us
	Animal
Day	2_1	2_2	2_3	2_4	2_5	2_6	2_7	2_8	2_9	2_10
1	300	30	50	100	150	50	150	30	30	50
2	300	30	50	300	100	150	250	20	30	150
3		200	50	350	150	150	200	20	30	150
4		200	300		300	250	300	20	50
5	400	80	300	600	400	250
6		120	300	600	500					150
7		120	250					50	500

## Sheet: Cohort 2 HRT @ 500us
	Animal
Day	2_1	2_2	2_3	2_4	2_5	2_6	2_7	2_8	2_9	2_10
1
2
3										40
4				600				10	20
5							800
6				200	250					90
7								20	200
8	400					400
9					1000					800
10		600	300			600	1500	20	300
11	600				800
12										500
13		400	600					400	400
14	600						1500
15					800
16		400						1000
17	600						1500		400
18					2000
19		600	2000					1000	400
20							1500
21					2000
22		600
23	1000								400
24							1000
25					800
26		600	1000						1000
27	800						1000
28					800
29		600
30	800								1000
31							1000
32					800
33
34
35
36
37							800
38					1000
39		600
40	800

## Sheet: Cohort 2 HRT @ 1000us
	Animal
Day	2_1	2_2	2_3	2_4	2_5	2_6	2_7	2_8	2_9	2_10
1
2
3										20
4								7	15
5							400
6				120	150					60
7								10	100
8						400	800
9					600
10			200			600	800	10	150
11					600
12										500
13		300	400					200	300
14	400						800
15
16		300						500
17							700		300
18
19		300	2000					750
20							700
21
22		300	2000
23	700
24							600
25
26		500	2000					2000	1000
27	700						700
28
29		500	2000
30
31
32
33
34
35
36
37							700	2000
38
39		500	2000		500
40

## Sheet: Cohort 2 Impedance
	Animal
Day	2_1	2_2	2_3	2_4	2_5	2_6	2_7	2_8	2_9	2_10
1	13	22	25	23	26	42	25	20	16	36
2	30	22	27	22	30	35	25	23	18	22
3		25	27	22	32	32	25	23	10	22
4		32	26	22	32	16	11	14	9
5	27	29	27	29	18	18	11
6		16	27	28	17					22
7		16	14					14	4
8	17					18	14
9				30	17					10
10		13	10			10	8	8	2.5
11	17			30	8
12
13		8	6
14	17
15										16
16								13	15
17						14	16		16
18				32	20					18
19		18	15					14	19
20	30					14	16
21					20					15
22		18	15
23	36							14	17
24							15
25					17					15
26		19	12					14	14
27	28						16
28					16
29		19	12
30	34
31
32
33
34
35
36
37
38					16		37	13	15
39		18	12
40	33

## Sheet: Cohort 3 HRT @ 500us
	Animal
Day	3_1	3_2	3_3	3_4	3_5	3_6	3_7	3_8	3_9
1
2
3								100	100
4
5							400
6					1000	250
7				400
8			80
9		800
10	600
11
12								300	400
13							400
14
15				1000	1000
16			100
17		800
18	1200
19
20								800	400
21							400
22
23					1000
24				1000
25			100
26		800
27	1400
28
29
30
31
32
33
34
35
36
37
38
39
40

## Sheet: Cohort 3 Impedance
	Animal
Day	3_1	3_2	3_3	3_4	3_5	3_6	3_7	3_8	3_9
1
2
3								15	18
4
5							12
6					18	23
7				20
8			20
9		12
10	15
11
12								15	19
13							12
14
15				25	19
16			20
17		18
18	11
19
20								29	22
21							17
22
23					23
24				25
25			20
26		20
27	11
28
29
30
31
32
33
34
35
36
37
38
39
40

## Sheet: Pre-Implant Impedance Cohort2
Mouse	Impd e1	Impd e2	Sum
2_1	9.2	7.5	16.7
2_2	9.4	6.8	16.2
2_3	8.1	8.9	17
2_4	7	8	15
2_5	8.3	6.6	14.9
2_6	8.2	7.5	15.7
2_7	N/A	N/A	N/A
2_8	3.8	4.7	8.5
2_9	8.8	7.7	16.5
2_10	5.9	5.8	11.7

[truncated: 1 more sheets: Pre-Implant Impedance Cohort1]
