# Supplementary material for: Development and characterization of a chronic implant mouse model for vagus nerve stimulation
Source: eLife. 2021 Apr 6;10:e61270. doi: 10.7554/eLife.61270 (PMC8051950; doi:10.7554/eLife.61270)
Supplement: Figure 4—source data 1. [file elife-61270-fig4-data1.xlsx]

## Sheet: HR and SBP 10s averages
Animal	HR 1	HR2	delta HR	SBP1	SBP2	delta BP		ratio	|ratio|
WT 051	462.6	417.7	-44.9	86	103	17		-2.64118	2.64118
WT 052	457.9	343.8	-114.1	88	110	22		-5.18636	5.18636
WT 021	424	353.7	-70.3	109	130	21		-3.34762	3.34762
WT 181	435.3	384	-51.3	105	144	39		-1.31538	1.31538
implant D39	468	354	-114	96	122	26		-4.38462	4.38462
Implant D35	474.4	402.7	-71.7	132	160	28		-2.56071	2.56071
Implant D34	461.6	417	-44.6	84	106	22		-2.02727	2.02727
Implant D37	465.7	432	-33.7	87.7	108	20.3		-1.6601	1.6601
